# Supplementary material for: Use of Direct Acting Oral Anticoagulants in Elderly Patients with Atrial Fibrillation: A Multicenter, Cross-Sectional Study in Spain
Source: MDPI journal article supplement (doi:10.3390/jcm12031224), 2023-02-03
Supplement: s1 [file s1]

## **SUPPLEMENTARY MATERIAL**

Table S1. Recommended dosing criteria for each NOAC according to the SmPC

Figure S1. Clinical Frailty Scale score at the time of the study visit according to current NOAC type

Table S2. Current NOAC treatment dose by sex

Table S1. Recommended dosing criteria for each NOAC according to the SmPC

| NOAC        | Standard dose | Reduced dose | SmPC recommendations for dose reduction                                                                                                                                                                                                                                                                                                                                                                                                                                                                                                                               |
|-------------|---------------|--------------|-----------------------------------------------------------------------------------------------------------------------------------------------------------------------------------------------------------------------------------------------------------------------------------------------------------------------------------------------------------------------------------------------------------------------------------------------------------------------------------------------------------------------------------------------------------------------|
| Dabigatran  | 150mg BID     | 110mg BID    | <p>Patients with the following criteria:</p> <ul style="list-style-type: none"> <li>• age <math>\geq 80</math> years or concomitant use of verapamil*</li> <li>• age <math>&lt; 80</math> years with high bleeding risk (evaluated as HAS-BLED <math>\geq 3</math>) <u>consider</u> low dose with at least one of the following criteria: <ul style="list-style-type: none"> <li>◦ age between 75–79 years</li> <li>◦ moderate renal impairment (CrCl 30– 50 mL/min)</li> <li>◦ presence of gastritis, esophagitis or gastroesophageal reflux*</li> </ul> </li> </ul> |
| Rivaroxaban | 20mg qD       | 15mg qD      | <p>Patients with the following criteria:</p> <ul style="list-style-type: none"> <li>• moderate/severe renal impairment (CrCl 15–49 ml/min)</li> </ul>                                                                                                                                                                                                                                                                                                                                                                                                                 |
| Apixaban    | 5mg BID       | 2.5 mg BID   | <p>Patients with the following criteria:</p> <ul style="list-style-type: none"> <li>• severe renal impairment (CrCl 15–29 mL/min)</li> <li>• moderate renal impairment (CrCl <math>\geq 30</math> mL/min) and at least comply 2 of 3 following criteria: <ul style="list-style-type: none"> <li>◦ age <math>\geq 80</math> years</li> <li>◦ body weight <math>\leq 60</math> kg</li> <li>◦ serum creatinine <math>\geq 1.5</math> mg/dL (133 <math>\mu</math>mol/L)</li> </ul> </li> </ul>                                                                            |
| Edoxaban    | 60mg qD       | 30mg qD      | <p>Patients meeting one of the following criteria:</p> <ul style="list-style-type: none"> <li>• moderate/severe renal impairment (CrCl 15–50 ml/min)</li> <li>• body weight <math>\leq 60</math> kg</li> <li>• concomitant use of the P-gp inhibitors (dronedarone, ciclosporin, erythromycin, ketoconazole) *</li> </ul>                                                                                                                                                                                                                                             |

BID: twice a day; qD: once a day; CrCl: creatinine clearance. SmPC: Summary of product characteristics. \* Criteria not evaluated in the present study. According to table S1, the recommended dose for some treatments relies on the fulfilment of at least one of the criteria. Therefore, if a patient met one criteria, despite having CrCl not available, the patient could be assessed in terms of dosing adequateness. For example, if a patient taking Edoxaban weighed  $<60$  kg and was receiving a dose  $>30$  mg, this dose should have been reduced and considered for analysis, even though CrCl was not available. Within our sample, only 42 cases (8.4%; 5 with Rivaroxaban, 33 with Apixaban and 4 with Edoxaban) could not be analyzed in terms of dosing adequateness.

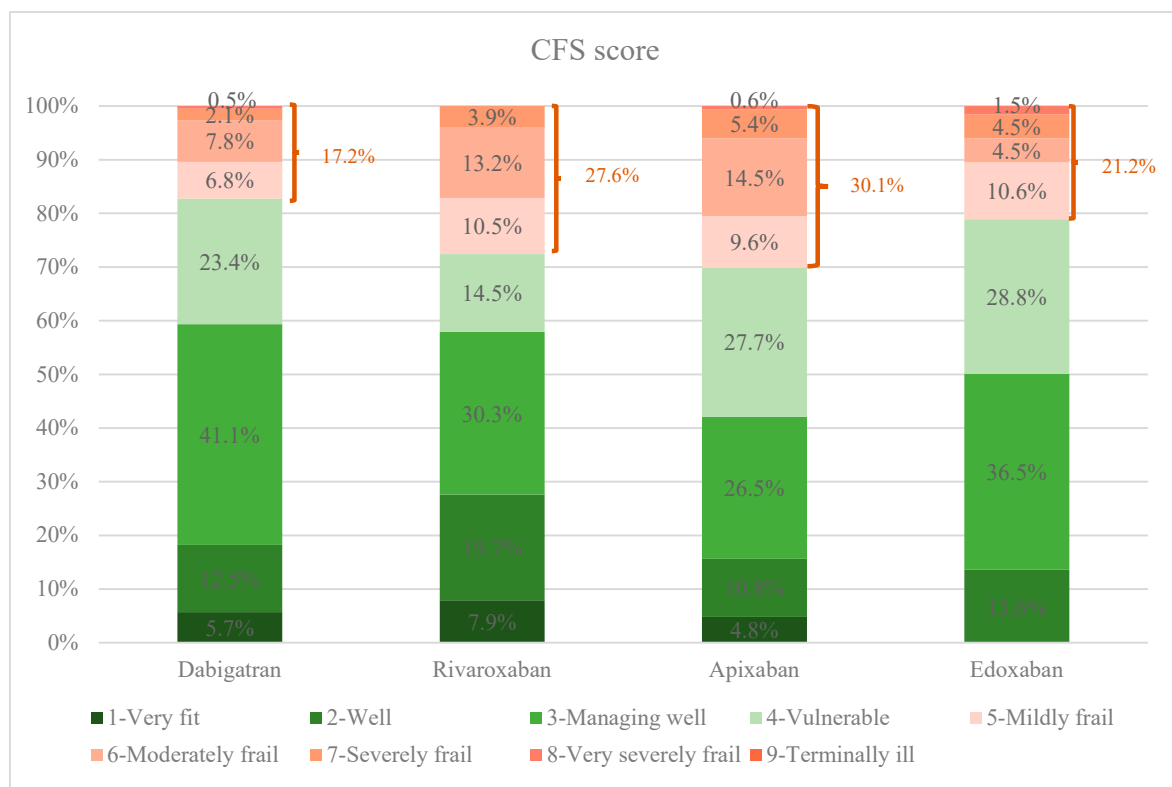

Figure S1. Clinical Frailty Scale score at the time of the study visit according to current NOAC type. CFS=Clinical frailty scale. Patients were assigned a score between 1–9 (1: very fit; 2: well; 3: managing well; 4: vulnerable; 5: mildly frail; 6: moderately frail; 7: severely frail; 8: very severely frail and 9: terminally ill) based on the evaluation of their symptoms, level of inactivity, exhaustion and basic or instrumental activities of daily living. Frailty was defined when CFS >4.

Table S2. Current NOAC treatment dose by sex

|                  |            | <b>Male</b> | <b>Female</b> | <b>Total</b> |
|------------------|------------|-------------|---------------|--------------|
|                  |            | (n=250)     | (n=250)       | 500          |
| Dabigatran dose  | Valid N    | 115         | 77            | 192          |
|                  | 110 mg BID | 56 (48.7%)  | 41 (53.2%)    | 97 (50.5%)   |
|                  | 150 mg BID | 59 (51.3%)  | 36 (46.8%)    | 95 (49.5%)   |
| Rivaroxaban dose | Valid N    | 30          | 46            | 76           |
|                  | 15 mg QD   | 8 (26.7%)   | 23 (50.0%)    | 31 (40.8%)   |
|                  | 20 mg QD   | 22 (73.3%)  | 23 (50.0%)    | 45 (59.2%)   |
| Apixaban dose    | Valid N    | 72          | 94            | 166          |
|                  | 2.5 mg BID | 31 (43.1%)  | 43 (45.7%)    | 74 (44.6%)   |
|                  | 5 mg BID   | 41 (56.9%)  | 51 (54.3%)    | 92 (55.4%)   |
| Edoxaban dose    | Valid N    | 33          | 33            | 66           |
|                  | 30 mg QD   | 13 (39.4%)  | 18 (54.5%)    | 31 (47.0%)   |
|                  | 60 mg QD   | 20 (60.6%)  | 15 (45.5%)    | 35 (53.0%)   |

BID: twice a day; QD: once a day
